# Supplementary material
Source: MDPI journal article supplement (https://www.mdpi.com/1996-1073/16/1/426)
Supplement: s1 [file s1]

**Supplemental information:**

**Table S1.** Experimental details of the preparation of the di-ureasil ormolytes.

|                                     | Jeffamine ED-600 mass (g) | Jeffamine ED-900 mass (g) | ICPTES Volume ( $\mu\text{L}$ ) | Ethanol Volume ( $\mu\text{L}$ ) | Water Volume ( $\mu\text{L}$ ) | Doping agents (g) |          |
|-------------------------------------|---------------------------|---------------------------|---------------------------------|----------------------------------|--------------------------------|-------------------|----------|
|                                     |                           |                           |                                 |                                  |                                | LiBF <sub>4</sub> | [Bmim]Cl |
| d-U(600) $\infty$                   | 1.021                     |                           | 849.97                          | 803.67                           | 91.85                          |                   |          |
| d-U(600)[Bmim]Cl                    | 1.014                     |                           | 844.31                          | 798.31                           | 91.23                          |                   | 0.1012   |
| d-U(600)LiBF <sub>4</sub> -[Bmim]Cl | 1.022                     |                           | 851.72                          | 805.32                           | 92.03                          | 0.0689            | 0.1046   |
| d-U(900) $\infty$                   |                           | 1.001                     | 556.31                          | 457.39                           | 60.11                          |                   |          |
| d-U(900)[Bmim]Cl                    |                           | 1.004                     | 557.65                          | 458.49                           | 60.26                          |                   | 0.1015   |
| d-U(900)LiBF <sub>4</sub> -[Bmim]Cl |                           | 1.026                     | 579.76                          | 468.44                           | 61.57                          | 0.0672            | 0.1033   |

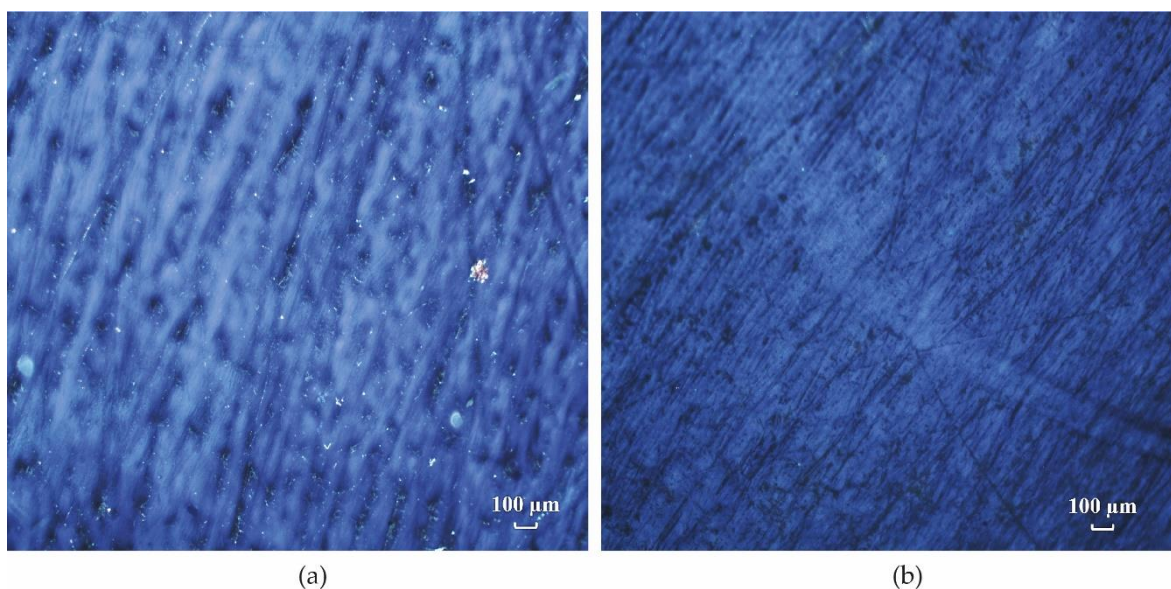

**Figure S1.** POM (crossed polarizers) images of d-U(600)LiBF<sub>4</sub>-[Bmim]Cl (a) and d-U(900)LiBF<sub>4</sub>-[Bmim]Cl

**Table S2.** AFM roughness values of the d-U(600) and d-U(900)-based di-ureasil ormolytes.

| Sample                              | Average roughness (Ra; nm) | RMS roughness (Rq; nm) |
|-------------------------------------|----------------------------|------------------------|
| d-U(600) $\infty$                   | 9.5                        | 15.71                  |
| d-U(600)LiBF <sub>4</sub> -[Bmim]Cl | 40.32                      | 51.93                  |
| d-U(900) $\infty$                   | 12.02                      | 16.04                  |
| d-U(900)LiBF <sub>4</sub> -[Bmim]Cl | 4.15                       | 5.64                   |

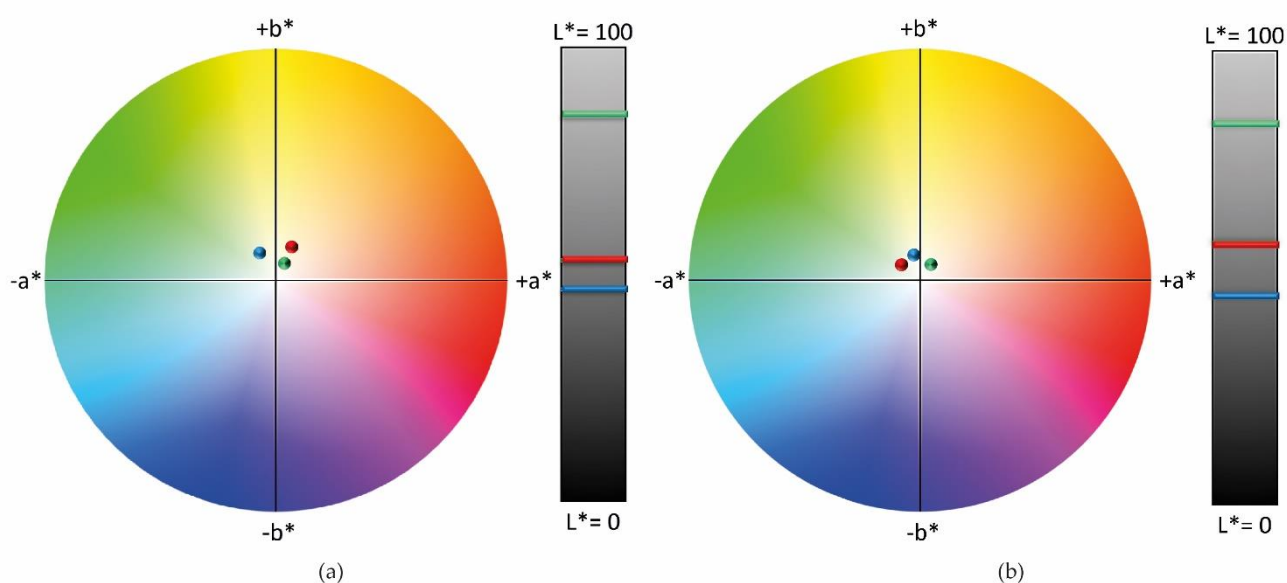

**Figure S2.** 1976 CIE  $L^*a^*b^*$  color diagrams of the ECD1 (a) and ECD2 (b). The green, red and blue colors correspond to the values after applying a voltage of  $\pm 2.0$  V,  $\pm 2.5$  V and  $\pm 3.0$  V, on the ECDs.

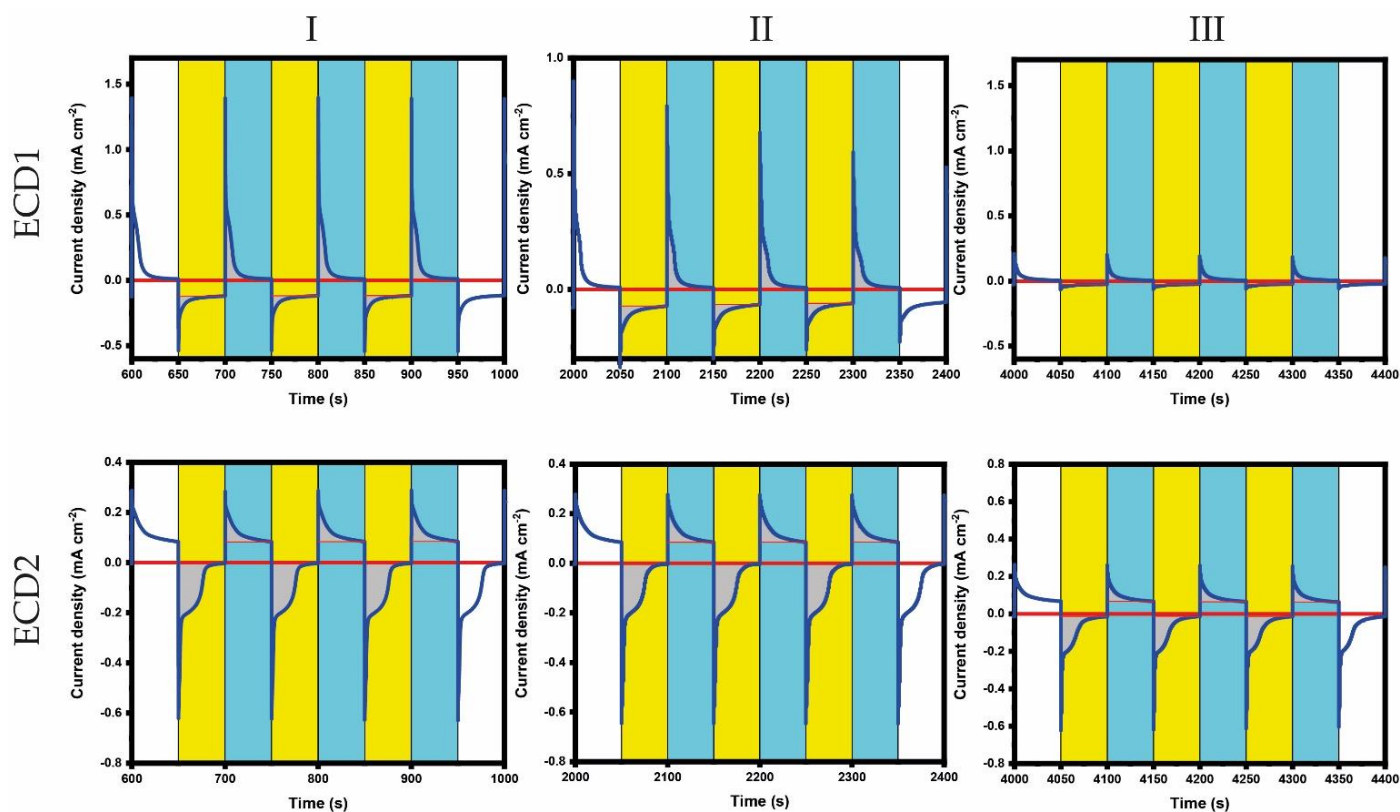

**Figure S3.** Time intervals (s) at which the CE values were measured and calculated. The yellow is for the inserted charge and the blue is for the de-inserted charge.

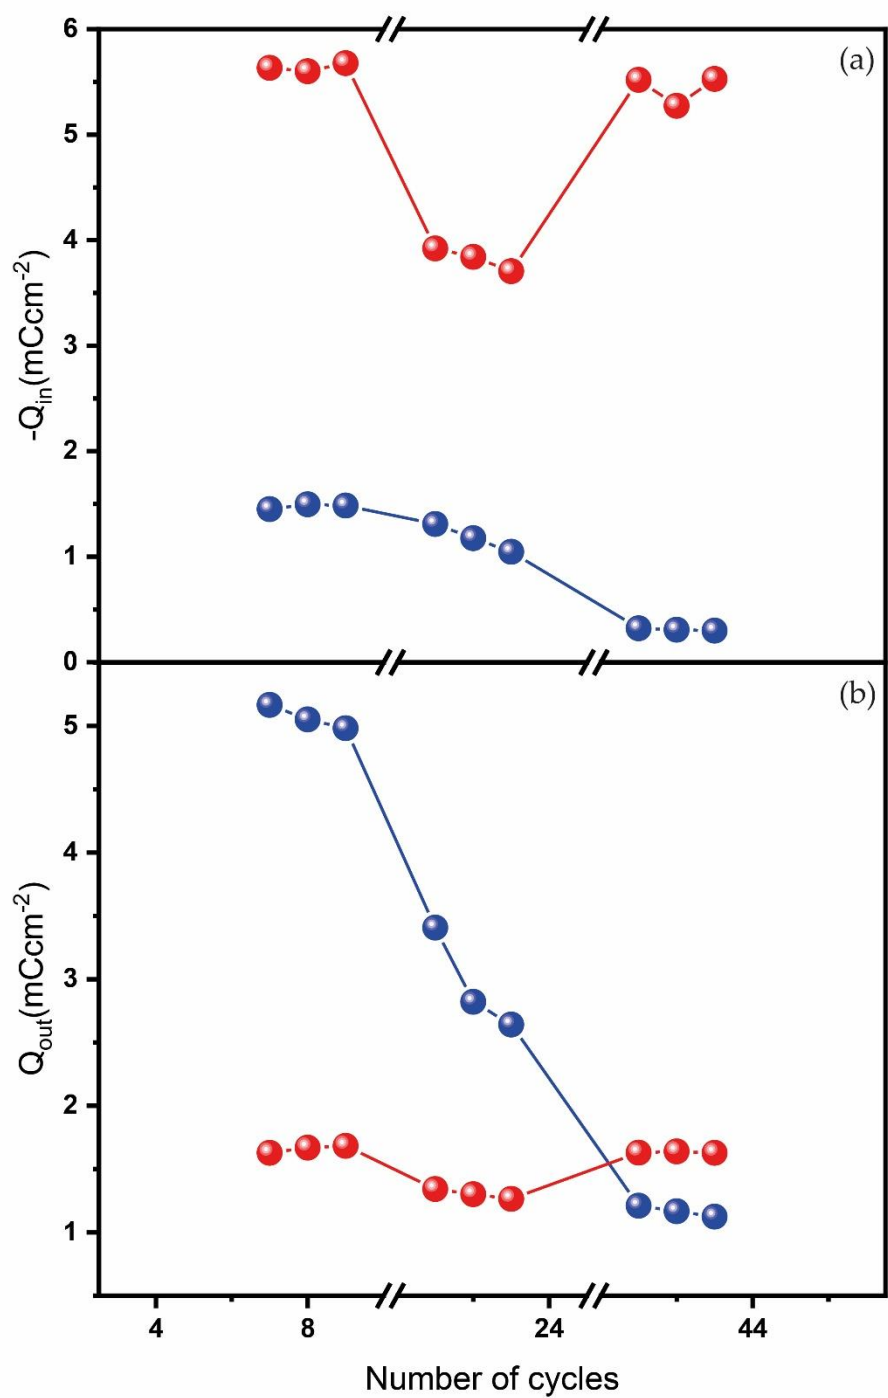

**Figure S4.** Inserted ( $-Q_{in}$ ) (a) and de-inserted ( $Q_{out}$ ) (b) charge density as function of the number of cycles for ECD1 (red symbols) and ECD2 (blue symbols).
